# Supplementary material for: Genetic Characterization of Lumpy Skin Disease Viruses Circulating in Lesotho Cattle
Source: MDPI journal article supplement (doi:10.3390/v16050762), 2024-05-11
Supplement: s1 [file s1]

Table S1: Information on specimens, including location, collection date, and geo-coordinates for the period 2022-2022

| Sample            | Collected date | District      | Village           | Latitude  | Longitude  |
|-------------------|----------------|---------------|-------------------|-----------|------------|
| LSD_Leso_Tsakholo | 12/3/2021      | Mafeteng      | Tsakholo          | -29.6498  | 27.1552844 |
| LSD_Leso_585      | 5/1/2022       | Berea         | Mokhethoaneng     | -29.23466 | 27.564492  |
| LSD_Leso_584      | 5/2/2022       | Maseru        | mantsebo          | -29.4655  | 27.5055461 |
| LSD_Leso_88       | 6/2/2022       | Maseru        | Ha Malelu         | -29.56243 | 27.394117  |
| LSD_Leso_506      | 11/2/2022      | Berea         | Foso              | -29.26961 | 27.592152  |
| LSD_Leso_Sefikeng | 16/01/2021     | Berea         | Sefikeng          | -29.28248 | 27.810202  |
| LSD_Leso_484      | 16/01/2022     | Maseru        | Ha Motemekoane    | -29.50097 | 27.543678  |
| LSD_Leso_490      | 16/01/2022     | Leribe        | Liphakoeng        | -28.93504 | 27.825098  |
| LSD_Leso_LAC1     | 16/01/2022     | Maseru        | LAC               | -29.29119 | 27.502982  |
| LSD_Leso_LAC2     | 16/01/2022     | Maseru        | LAC               | -29.29119 | 27.502982  |
| LSD_Leso_485      | 17/01/2022     | Maseru        | Ha Mmajane        | -29.54516 | 27.453774  |
| LSD_Leso_604      | 17/01/2022     | Maseru        | Ha Mokhele        | -29.55582 | 27.466205  |
| LSD_Leso_601      | 17/03/2022     | Mafeteng      | Matelile          | -29.81553 | 27.4986183 |
| LSD_Leso_480      | 19/01/2021     | Leribe        | Liphakoeng        | -28.93504 | 27.825098  |
| LSD_Leso_605      | 20/01/2022     | Leribe        | Liphakoeng        | -28.95184 | 27.854111  |
| LSD_Leso_Ntlama   | 20/02/2021     | Berea         | Ntlama            | -29.1722  | 27.8731863 |
| LSD_Leso_87.2     | 23/02/2022     | Mohales' Hoek | Lengopeng la-ntja | -29.31089 | 27.495247  |
| LSD_Leso_489      | 26/01/2022     | Maseru        |                   | -29.44725 | 27.505546  |

Table S2: Sequence information including location, isolate name, accession numbers for Whole genome, RPO30, and GPCR gene sequences

| Item No. | Location      | Name of Isolate    | Accession No. | Gene sequence |
|----------|---------------|--------------------|---------------|---------------|
| 1        | Leribe        | LSDV_Leso_490      | PP065788      | Whole genome  |
| 2        | Maseru        | LSDV_Leso_Lac1     | PP065789      | Whole genome  |
| 3        | Mohales Hoek  | LSDV_Leso_87.2     | PP065790      | RPO30         |
| 4        | Maseru        | LSDV_Leso_484      | PP065791      | RPO30         |
| 5        | Maseru        | LSDV_Leso_485      | PP065792      | RPO30         |
| 6        | Maseru        | LSDV_Leso_489      | PP065793      | RPO30         |
| 7        | Maseru        | LSDV_Leso_584      | PP065794      | RPO30         |
| 8        | Maseru        | LSDV_Leso_Lac2     | PP065795      | RPO30         |
| 9        | Berea         | LSDV_Leso_Sefikeng | PP065796      | RPO30         |
| 10       | Berea         | LSDV_Leso_NTLA     | PP065797      | RPO30         |
| 12       | Mafeteng      | LSDV_Leso_Tsa2     | PP065798      | RPO30         |
| 13       | Mohales' Hoek | LSDV_Leso_87.2     | PP065799      | GPCR          |
| 14       | Maseru        | LSDV_Leso_484      | PP065800      | GPCR          |
| 15       | Maseru        | LSDV_Leso_485      | PP065801      | GPCR          |
| 16       | Maseru        | LSDV_Leso_489      | PP065802      | GPCR          |
| 17       | Maseru        | LSDV_Leso_584      | PP065803      | GPCR          |
| 18       | Maseru        | LSDV_Leso_Lac2     | PP065804      | GPCR          |
| 19       | Berea         | LSDV_Leso_Sefikeng | PP065805      | GPCR          |
| 20       | Berea         | LSDV_Leso_NTLA     | PP065806      | GPCR          |
| 21       | Mafeteng      | LSDV_Leso_Tsa2     | PP065807      | GPCR          |

Table S3: Sequence information including location, isolate name, accession numbers for EEV glycoprotein and B22R gene sequence

| Item No. | Location      | Name of Isolate    | Accession No. | Gene sequence    |
|----------|---------------|--------------------|---------------|------------------|
| 1        | Mohales' Hoek | LSDV_Leso_87.2     | PP065808      | EEV glycoprotein |
| 2        | Maseru        | LSDV_Leso_484      | PP065809      | EEV glycoprotein |
| 3        | Maseru        | LSDV_Leso_485      | PP065810      | EEV glycoprotein |
| 4        | Maseru        | LSDV_Leso_489      | PP065811      | EEV glycoprotein |
| 5        | Maseru        | LSDV_Leso_584      | PP065812      | EEV glycoprotein |
| 6        | Maseru        | LSDV_Leso_Lac2     | PP065813      | EEV glycoprotein |
| 7        | Berea         | LSDV_Leso_Sefikeng | PP065814      | EEV glycoprotein |
| 8        | Berea         | LSDV_Leso_NTLA     | PP065815      | EEV glycoprotein |
| 9        | Mafeteng      | LSDV_Leso_Tsa2     | PP065816      | EEV glycoprotein |
| 10       | Maseru        | LSDV_Leso_484      | PP065817      | B22R             |
| 11       | Maseru        | LSDV_Leso_Lac2     | PP065818      | B22R             |
| 12       | Berea         | LSDV_Leso_Sefikeng | PP065819      | B22R             |
| 13       | Mafeteng      | LSDV_Leso_Tsa2     | PP065820      | B22R             |
